# Supplementary material
Source: Springer Nature journal article supplement (https://www.springermedizin.de/resource/supplementary/12885_2011_3337_MOESM3_ESM.pdf/9462892)
Supplement: MOESM3 [file 9462892]

Quality rating: -1=poor/very poor  
1=good/very good

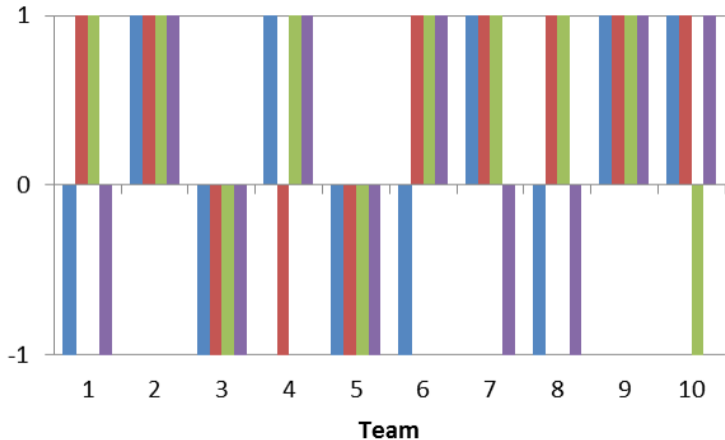

The team

Infrastructure for meetings

Meeting organisation and logistics

Clinical decision-making
